# Supplementary material for: CRISPR-mediated rapid generation of neural cell-specific knockout mice facilitates research in neurophysiology and pathology
Source: PubMed Central journal article supplement — Mol Ther Methods Clin Dev. 2021 Feb 18;20:755–64. doi: 10.1016/j.omtm.2021.02.012 (PMC7940702; doi:10.1016/j.omtm.2021.02.012), 2021-02-18
Supplement: mmc1.pdf [file mmc1.pdf]

**OMTM, Volume 20**

**Supplemental information**

**CRISPR-mediated rapid generation of neural  
cell-specific knockout mice facilitates  
research in neurophysiology and pathology**

**Dan Xiao, Weifeng Zhang, Qing Wang, Xing Li, Yuan Zhang, Javad Rasouli, Giacomo Casella, Bogoljub Ciric, Mark Curtis, Abdolmohamad Rostami, and Guang-Xian Zhang**

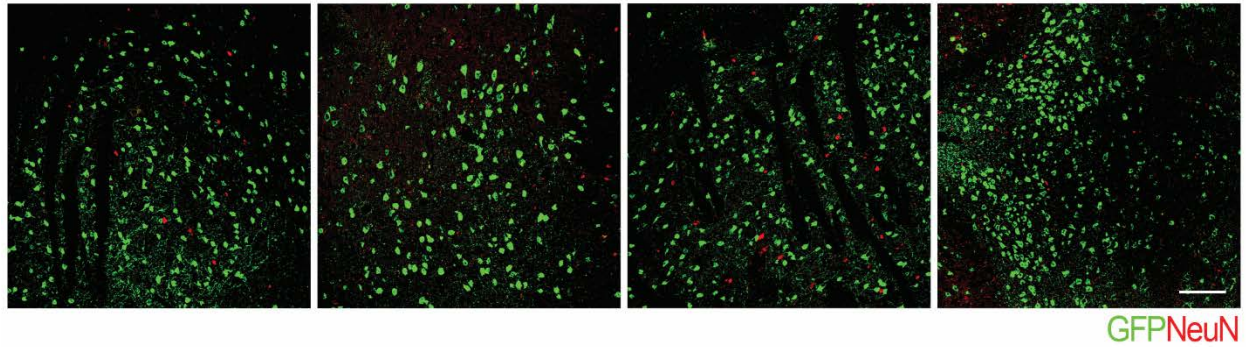

GFPNeuN

**Figure S1. Neuron-specific NeuN knockout in thalamus.** PHP.eB-sgNeuN-hSYN1-Cre or PHP.eB-sgScram-hSYN1-Cre was i.v. injected into naïve adult LSL-Cas9 mice at  $5 \times 10^{11}$  vg per mouse. Brains were harvested two weeks later and analyzed by immunostaining. Representative images of four separate locations in the thalamus are shown. Scale bar: 100  $\mu$ m.

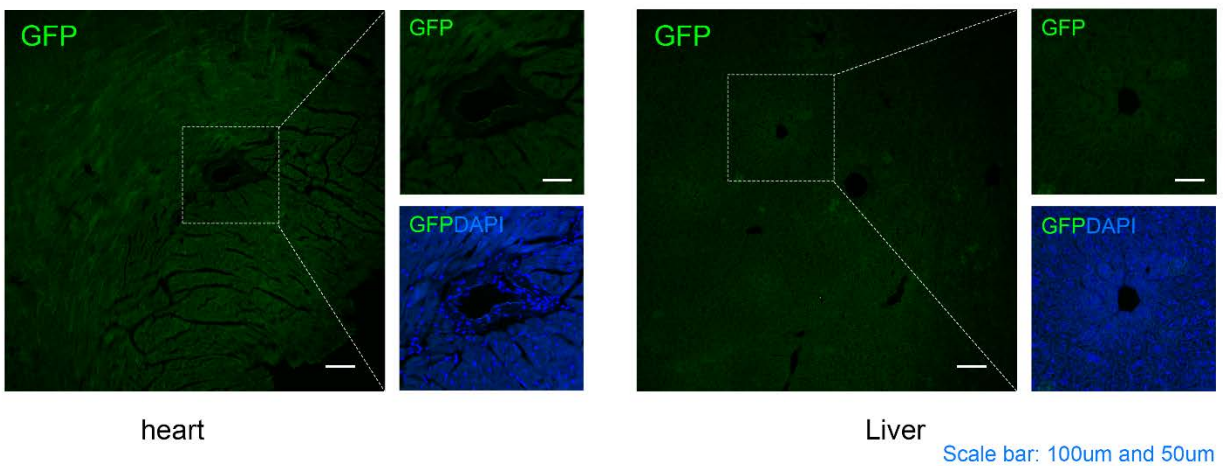

heart

Liver

Scale bar: 100um and 50um

**Figure S2.** Immunostaining of heart and liver of PHP.eB-sgScram-hSYN1-Cre i.v. injected mice. One representative image of 3 mice was shown. Scale bar: 100  $\mu$ m, scale bar of zoomed images: 50  $\mu$ m.

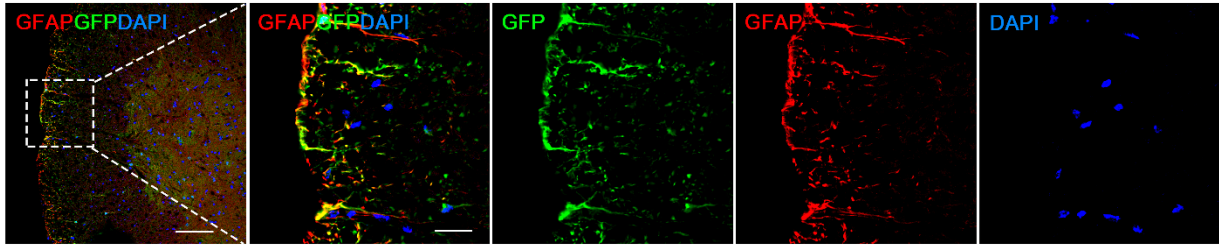

Astrocyte infection in naive mice

**Figure S3.** Immunostaining of the PHP.eB-sgScram-GFAP-Cre infected astrocytes in spinal cord of naïve LSL-Cas9 mice. One representative image of 2 mice was shown. Scale bar: 100  $\mu$ m, Scale bar of zoomed image: 20  $\mu$ m.

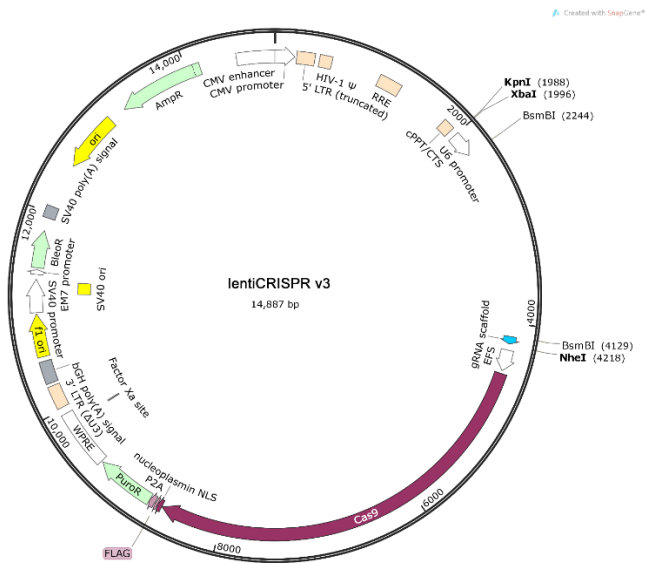

**Figure S4.** Schematic of lentiCRISPR v3 plasmid.

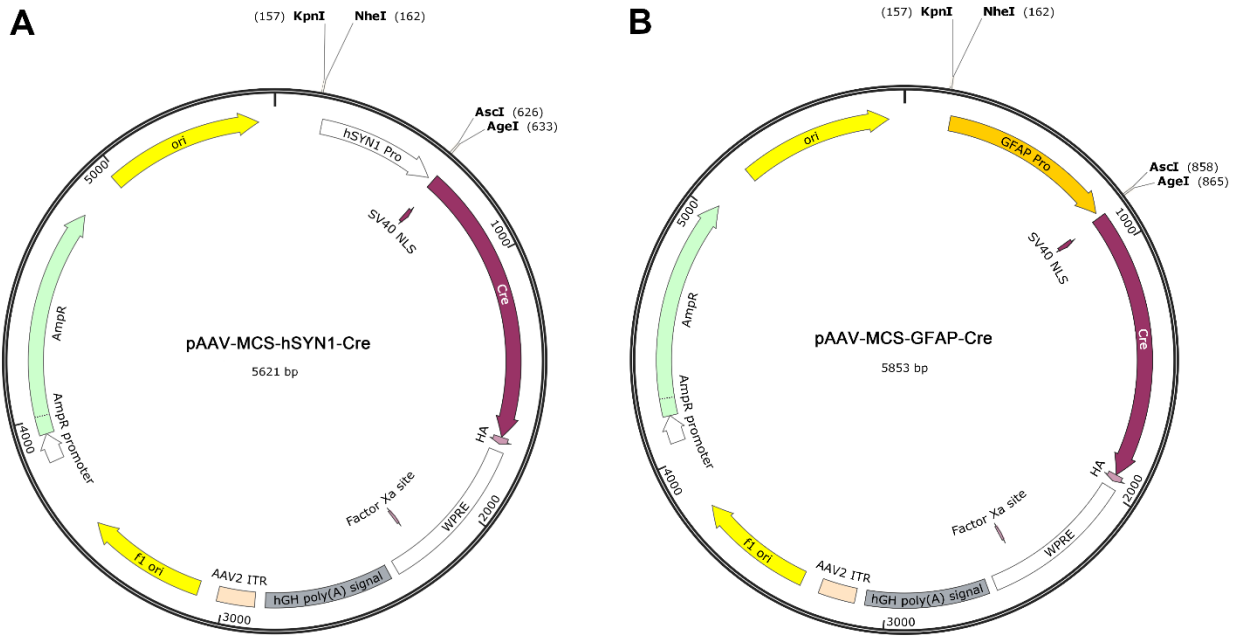

**Figure S5.** Schematic of AAV transfer plasmids for sgRNA delivery. (A) pAAV-MCS-hSYN1-Cre structure. (B) pAAV-MCS-GFAP-Cre structure.

**Table S1.** Comparison of Cre-ER-Loxp and AAV-CRISPR methods.

| Method for KO | Efficiency                                                                                        | Feasibility                                                                                                       | Time to generate                  | Cost | Labor |
|---------------|---------------------------------------------------------------------------------------------------|-------------------------------------------------------------------------------------------------------------------|-----------------------------------|------|-------|
| CreER-Loxp    | 70-80%                                                                                            | <b>Low</b><br>Limited by the availability of mouse lines with loxp sites inserted into the gene to be knocked out | Half year to one and a half years | High | High  |
| AAV-CRISPR    | <b>Neurons:</b><br>82% in brain;<br>65% in SC*<br><b>Astrocytes:</b><br>46% in brain<br>79% in SC | <b>High</b><br>Any gene of interest can be knocked out                                                            | Three to four weeks               | Low  | Low   |

\* SC: spinal cord

**Table S2.** List of primers used in this paper.

| Name of primer       | Sequence of primer        |
|----------------------|---------------------------|
| mNeuN DP for         | agggtagaggggatgagtg       |
| mNeuN DP reverse     | gaggcagactcaccacaaacc     |
| mNeuN sgRNA1 for     | CACCgtcggggtccctgaaccgga  |
| mNeuN sgRNA1 reverse | AAACtccgggtcaggacccccgac  |
| mNeuN sgRNA2 for     | CACCgactccaccctccgacccca  |
| mNeuN sgRNA2 reverse | AAACtggggtcgggaaggtggagtc |
| mNeuN sgRNA3 for     | CACCgtgggctgctgcttccctg   |
| mNeuN sgRNA3 reverse | AAACcacggagaagcagcagccac  |
| mGFAP DP for         | gtaacagcagcctcgtttcc      |
| mGFAP DP reverse     | tctctctgggcaagactggt      |
| mGFAP sgRNA1 for     | CACCggcccaacagcaggtccacg  |
| mGFAP sgRNA1 reverse | AAACcgtggactgctgttgggcc   |
| mGFAP sgRNA2 for     | CACCgagagattgcactcaatag   |
| mGFAP sgRNA2 reverse | AAACcgtattgagtgcgaatctctc |
| mGFAP sgRNA3 for     | CACCgtggccacatccatctccacg |
| mGFAP sgRNA3 reverse | AAACcgtggagatggatgtggccac |
| mGFAP sgRNA4 for     | CACCgtctctctcaggccgctgtg  |
| mGFAP sgRNA4 reverse | AAACcacagcggccctgagagagac |
| mAct1 DP for         | ctgggatctcagctttcage      |
| mAct1 DP reverse     | agtctctggacgttggcagt      |
| mAct1 sgRNA1 for     | CACCgtagtactgacagttcatg   |
| mAct1 sgRNA1 reverse | AAACcatggaactgtcagtactac  |

|                             |                                            |
|-----------------------------|--------------------------------------------|
| mAct1 sgRNA2 for            | CACCgaggtcctgcaggtaacacg                   |
| mAct1 sgRNA2 reverse        | AAACcgtgttacctgcaggacctc                   |
| mAct1 sgRNA3 for            | CACCgatgtgccacgatagacac                    |
| mAct1 sgRNA3 reverse        | AAACgtgtctatcgtgggcacatc                   |
| mAct1 sgRNA4 for            | CACCgtggccaagagatgatgcc                    |
| mAct1 sgRNA4 reverse        | AAACgggcatcatctcttgccac                    |
| Scramble sgRNA for          | caccgactcacatcgctacatca                    |
| Scramble sgRNA reverse      | aaactgatgtagc gatgtgagtgc                  |
| U6 KpnI for                 | TTAATTAAGGTACCATCGATTCTAgagggcctatttccatga |
| U6-insert SfuI reverse      | CAAAAGCATTTCGAAGTTTCTGAAGCAAT              |
| MPAA linker for             | cgcgattaattaaggtacctttgctagctttggcgcgcca   |
| MPAA linker reverse         | ccggtggcgcgccaagctagcaaaggtacctaataat      |
| GFAP promoter NheI for      | GCTAGCCCTGCAGGGAACATATCCTGGTGTGGAGTAG      |
| GFAP promoter AscI reverse  | TTCGAAGGCGCGCCGCGAGCAGCGGAGGTGATGC         |
| hSYN1 promoter NheI for     | GCTAGCCCTGCAGGgagtgcaagtgggttttag          |
| hSYN1 promoter AscI reverse | TTCGAAGGCGCGCCctgcgctctcaggcagac           |
